# Supplementary material for: Neomorphosis and heterochrony of skull shape in dog domestication
Source: PubMed Central journal article supplement (PMC5647425; doi:10.1038/s41598-017-12582-2), 2017-10-18
Supplement: 41598_2017_12582_MOESM1_ESM.pdf [file 41598_2017_12582_MOESM1_ESM.pdf]

## Neomorphosis and heterochrony of skull shape in dog domestication

Madeleine Geiger, Allowen Evin, Marcelo R. Sánchez-Villagra, Dominic Gascho, Cornelia Mainini, Christoph P. E. Zollikofer

**Supplementary Figure S1. Visualization of the relationship between the log of absolute age of the specimens (in days) and the log (centroid size) (top), and PC1 (bottom).** The grey shaded area signifies the age range of dental maturity, which commences at on average five months in domestic dogs and wolves<sup>1</sup>. Note that very young juveniles of Akita and Australian dingo have smaller cranial size (top) and less advanced cranial shape (bottom) than wolves of similar age.

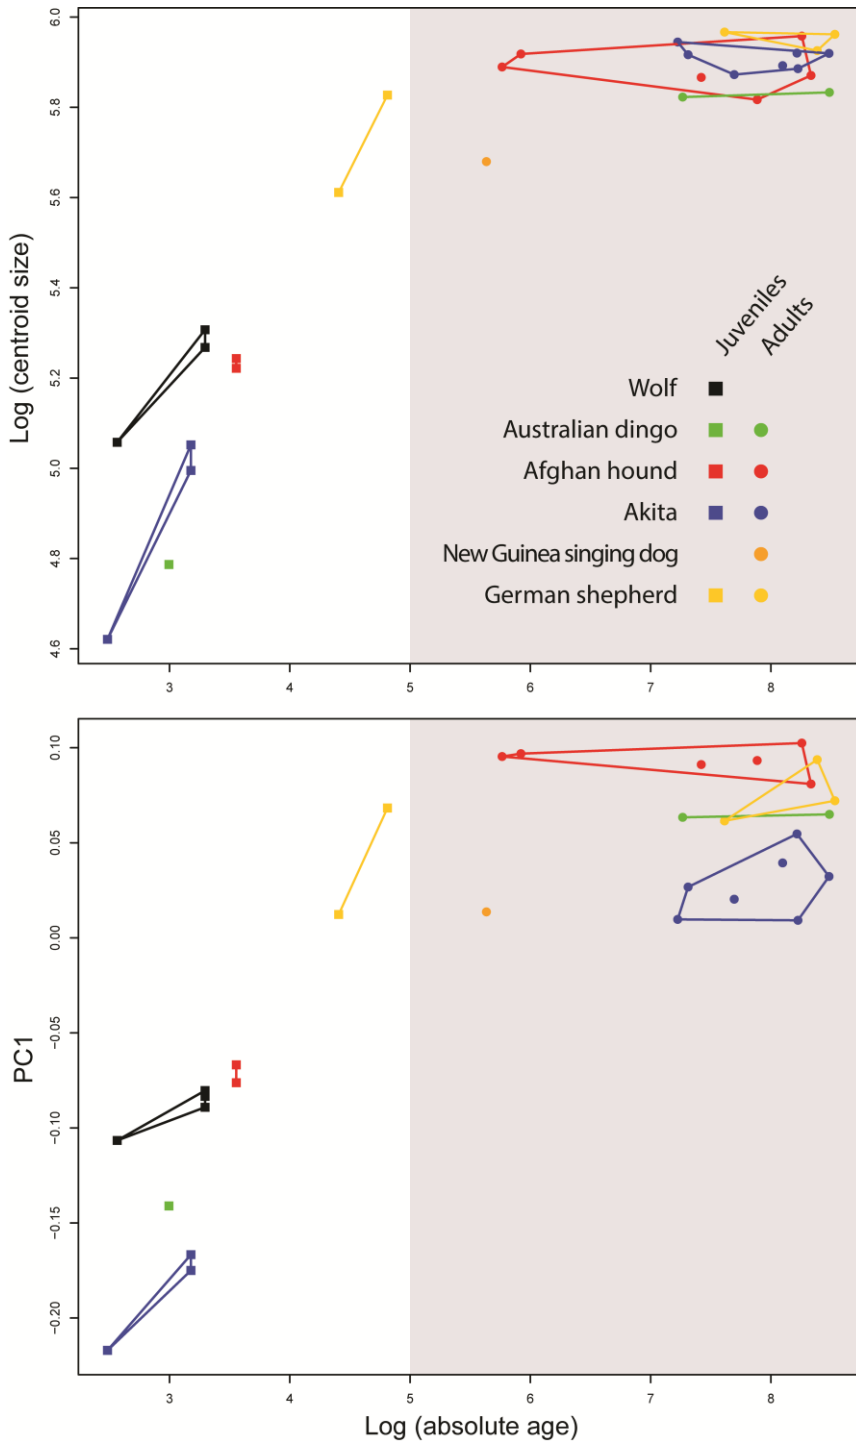

**Supplementary Table S1. Mahalanobis distances and associated p-values from all domestic dog groups and the wolf.** Distances are given below and p-values from pairwise MANOVA above the diagonal. Significant p-values are indicated in bold if they remained significant subsequent to corrections for multiple testing. Ad, adult; Afgh, Afghan hound; Akit, Akita; Ausd, Australian dingo; Gers, German shepherd; juv, juvenile; Ngds, New Guinea singing dog; Prhd, Prehistoric dogs; Poid, Pointing dog.

|          | Afgh juv | Afgh ad           | Akit juv          | Akit,ad           | Ausd juv          | Aus ad            | Gers juv          | Gers ad           | Ngds ad           | Prhd ad           | Poid juv          | Poid ad           | Wolf juv          | Wolf ad           |
|----------|----------|-------------------|-------------------|-------------------|-------------------|-------------------|-------------------|-------------------|-------------------|-------------------|-------------------|-------------------|-------------------|-------------------|
| Afgh juv |          | <b>&lt;0.0001</b> | 0.37              | <b>&lt;0.0001</b> | 0.33              | <b>&lt;0.0001</b> | 0.07              | <b>&lt;0.0001</b> | <b>&lt;0.0001</b> | <b>&lt;0.0001</b> | <b>&lt;0.0001</b> | <b>&lt;0.0001</b> | <b>&lt;0.0001</b> | <b>&lt;0.0001</b> |
| Afgh ad  | 41.91    |                   | <b>&lt;0.0001</b> | <b>&lt;0.0001</b> | <b>&lt;0.0001</b> | <b>&lt;0.0001</b> | <b>&lt;0.0001</b> | <b>&lt;0.0001</b> | <b>&lt;0.0001</b> | <b>&lt;0.0001</b> | <b>&lt;0.0001</b> | <b>&lt;0.0001</b> | <b>&lt;0.0001</b> | <b>&lt;0.0001</b> |
| Akit juv | 59.49    | 111.17            |                   | <b>&lt;0.0001</b> | <b>0.04</b>       | <b>&lt;0.0001</b> | 0.23              | <b>&lt;0.0001</b> | <b>&lt;0.0001</b> | <b>0.01</b>       | 0.07              | 0.05              | <b>&lt;0.0001</b> | <b>&lt;0.0001</b> |
| Akit,ad  | 102.36   | 82.79             | 48.14             |                   | <b>&lt;0.0001</b> | <b>&lt;0.0001</b> | <b>&lt;0.0001</b> | <b>&lt;0.0001</b> | <b>&lt;0.0001</b> | <b>&lt;0.0001</b> | <b>&lt;0.0001</b> | <b>&lt;0.0001</b> | <b>&lt;0.0001</b> | <b>&lt;0.0001</b> |
| Ausd juv | 36.16    | 29.73             | 46.92             | 37.06             |                   | <b>0.02</b>       | 0.63              | <b>&lt;0.0001</b> | <b>&lt;0.0001</b> | <b>&lt;0.0001</b> | <b>&lt;0.0001</b> | <b>0.03</b>       | <b>0.01</b>       | <b>&lt;0.0001</b> |
| Aus ad   | 67.38    | 25.10             | 72.10             | 35.73             | 13.51             |                   | <b>&lt;0.0001</b> | <b>&lt;0.0001</b> | <b>&lt;0.0001</b> | <b>&lt;0.0001</b> | <b>&lt;0.0001</b> | <b>0.01</b>       | <b>&lt;0.0001</b> | <b>&lt;0.0001</b> |
| Gers juv | 26.05    | 27.26             | 72.89             | 76.79             | 18.18             | 40.10             |                   | <b>0.01</b>       | <b>&lt;0.0001</b> | <b>&lt;0.0001</b> | 0.12              | 0.09              | <b>0.03</b>       | <b>&lt;0.0001</b> |
| Gers ad  | 46.05    | 18.06             | 104.02            | 67.48             | 32.81             | 43.55             | 30.83             |                   | <b>&lt;0.0001</b> | <b>&lt;0.0001</b> | <b>&lt;0.0001</b> | <b>&lt;0.0001</b> | <b>&lt;0.0001</b> | <b>&lt;0.0001</b> |
| Ngds ad  | 91.12    | 76.82             | 83.42             | 43.38             | 59.76             | 47.97             | 100.98            | 66.52             |                   | <b>&lt;0.0001</b> | <b>&lt;0.0001</b> | <b>&lt;0.0001</b> | <b>&lt;0.0001</b> | <b>&lt;0.0001</b> |
| Prhd ad  | 77.09    | 32.60             | 83.25             | 46.72             | 12.40             | 10.78             | 31.60             | 42.39             | 73.32             |                   | <b>0.01</b>       | <b>0.02</b>       | <b>&lt;0.0001</b> | <b>&lt;0.0001</b> |
| Poid juv | 49.49    | 37.54             | 60.13             | 46.10             | 8.70              | 24.03             | 10.61             | 35.64             | 76.69             | 10.67             |                   | 0.07              | <b>&lt;0.0001</b> | <b>&lt;0.0001</b> |
| Poid ad  | 64.07    | 33.85             | 65.33             | 23.22             | 12.43             | 17.15             | 28.77             | 25.49             | 48.32             | 10.51             | 10.12             |                   | <b>&lt;0.0001</b> | <b>&lt;0.0001</b> |
| Wolf juv | 54.35    | 39.44             | 75.52             | 60.36             | 15.55             | 25.49             | 35.85             | 35.25             | 78.08             | 25.67             | 27.61             | 27.17             |                   | <b>&lt;0.0001</b> |
| Wolf ad  | 70.20    | 33.61             | 78.79             | 41.62             | 19.50             | 16.14             | 45.86             | 29.85             | 63.43             | 22.56             | 32.47             | 20.43             | 6.44              |                   |

### **Supplementary references**

1. Geiger, M., Gendron, K., Willmitzer, F. & Sánchez-Villagra, M. R. Unaltered sequence of dental, skeletal, and sexual maturity in domestic dogs compared to the wolf. *Zool. Lett.* **2**, 16 (2016).
